# Supplementary material for: Socioemotional Wealth and Debt Contract Design in Family Firms: Leverage, Maturity, and Rollover Risk in France
Source: Research Square preprint supplement (doi:10.21203/rs.3.rs-8648794/v1), 2026-02-04
Supplement: Supplementary file 1 [file e8194e7574e9a54fffd995f0.docx]

# Supplementary material

**Supplementary Table S1. Portfolio coherence: relational lending, payout, and liquidity.**

Dependent variable: Various (see columns)

| **Variables** | **(1) Bank concentration** | **(2) Payout ratio** | **(3) Cash slack** |
| --- | --- | --- | --- |
| SEW control (F) | 0.020** | 0.060*** | 0.010** |
|  | (0.008) | (0.020) | (0.004) |
| SEW identity (I) | 0.015** | 0.010 | 0.008* |
|  | (0.007) | (0.018) | (0.004) |
| SEW attachment (E), lagged | 0.030*** | -0.025** | 0.020*** |
|  | (0.010) | (0.012) | (0.005) |
| Profitability (ROA) | 0.005 | 0.120*** | 0.030** |
|  | (0.006) | (0.040) | (0.012) |
| Size (ln assets) | -0.010*** | 0.020** | -0.015*** |
|  | (0.003) | (0.010) | (0.004) |
| Tangibility (PPE/assets) | 0.012 | -0.010 | -0.020** |
|  | (0.010) | (0.015) | (0.008) |
| Growth (Δ ln assets) | -0.005 | -0.030** | 0.010 |
|  | (0.004) | (0.012) | (0.006) |
| Firm FE | Yes | Yes | Yes |
| Industry×Year FE | Yes | Yes | Yes |
| Obs. | 1260 | 1260 | 1260 |
| R² | 0.410 | 0.350 | 0.440 |
| Within R² | 0.060 | 0.040 | 0.070 |

Notes: Column (1) is a bank-concentration index (higher values indicate more concentrated relationship lending). When lender-level debt shares are available, we compute the Herfindahl–Hirschman Index (HHI) as , where is bank j’s share of firm i’s bank debt in year t. When lender-level shares are not available, we use the top-1 lender share as the primary proxy and standardize the measure so that higher values always mean higher concentration. Column (2) is the payout ratio defined as dividends divided by net income, set to 0 when net income ≤ 0 and capped at 1.25; Column (3) is cash slack measured as cash and equivalents divided by total assets. All models include firm fixed effects and industry×year fixed effects; standard errors are clustered by firm.

**Supplementary Table S2. Dynamic model (System-GMM) for leverage.**

Dependent variable: Leverage (Interest-bearing debt / assets)

| **Variables** | **(1) Full sample** | **(2) Family sample** |
| --- | --- | --- |
| L1 leverage | 0.620*** | 0.650*** |
|  | (0.050) | (0.060) |
| SEW control (F) | 0.012** | 0.020*** |
|  | (0.005) | (0.007) |
| Profitability (ROA) | -0.090** | -0.110** |
|  | (0.040) | (0.055) |
| Size (ln assets) | 0.010*** | 0.012*** |
|  | (0.003) | (0.004) |
| Tangibility (PPE/assets) | 0.070*** | 0.075** |
|  | (0.025) | (0.033) |
| Growth (Δ ln assets) | -0.015 | -0.018 |
|  | (0.010) | (0.014) |
| Firms | 180 | 90 |
| Obs. | 2700 | 1350 |
| Instruments | 145 | 78 |
| AR(1) p-value | 0.000 | 0.000 |
| AR(2) p-value | 0.240 | 0.310 |
| Hansen p-value | 0.210 | 0.190 |

Notes: Two-step System-GMM with Windmeijer-corrected standard errors. The lagged dependent variable and the SEW control index are treated as endogenous and instrumented with deeper lags; instruments are collapsed and lag depth is restricted to limit proliferation (Roodman, 2009). AR(1) and AR(2) are Arellano–Bond tests; Hansen is the overidentification test. Year fixed effects are included.

Supplementary Table S3. Leadership succession and debt maturity: Difference-in-differences estimates (baseline TWFE; staggered DiD results reported in Supplementary Table S4 and Appendix).

Dependent variable: Debt maturity (col 1) and leverage (col 2)

| **Variables** | **(1) Debt maturity** | **(2) Leverage** |
| --- | --- | --- |
| Post-succession | 0.020** | -0.005 |
|  | (0.008) | (0.004) |
| Post-succession × Attachment | 0.015*** | 0.002 |
|  | (0.006) | (0.003) |
| Post-succession × Identity | 0.012** | 0.001 |
|  | (0.005) | (0.003) |
| Firm FE | Yes | Yes |
| Industry×Year FE | Yes | Yes |
| Obs. | 980 | 980 |
| R² | 0.660 | 0.600 |
| Controls | Yes | Yes |

Notes: Treatment is a CEO/chair succession event dated from Pappers/BODACC filings. We define the event year as the first fiscal year in which the incoming CEO/chair is in office at the annual-report date (based on filing information). Postit = 1 for firm-years t ≥ event year. When multiple successions occur within a firm, we use the first observed succession to define event time; later transitions are absorbed into the post period. The DiD compares treated family firms to matched never-treated family controls. Standard errors clustered at the firm level.

Supplementary Table S4. Event-study around succession using the Sun and Abraham (2021) interaction-weighted estimator (dependent variable: debt maturity).

Notes: Coefficients are relative to the omitted pre-event year (t = −1). Event time is defined relative to the first observed succession for each treated firm. Standard errors are clustered by firm. Pre-trend coefficients (k ≤ −2) test the parallel-trends assumption.

| **Event time (t=k)** | **Coef. (Debt maturity)** | **Std. Err.** | **p-value** |
| --- | --- | --- | --- |
| k=-4 | -0.002 | 0.006 | 0.750 |
| k=-3 | -0.001 | 0.006 | 0.850 |
| k=-2 | 0.000 | 0.005 | 0.990 |
| k=0 | 0.004 | 0.006 | 0.480 |
| k=1 | 0.010 | 0.006 | 0.100 |
| k=2 | 0.016 | 0.007 | 0.020 |
| k=3 | 0.020 | 0.008 | 0.010 |
| k=4 | 0.022 | 0.009 | 0.015 |

**Supplementary Table S5. Propensity score matching estimates (ATT).**

Notes: Nearest-neighbor matching within caliper; common support imposed. ATT compares family firms to matched non-family firms.

| **Outcome** | **ATT (Family – matched non-family)** | **Std. Err.** | **t-stat** |
| --- | --- | --- | --- |
| Leverage | 0.015 | 0.006 | 2.500 |
| Debt maturity | 0.028 | 0.010 | 2.800 |
| Bank concentration | 0.022 | 0.009 | 2.444 |
| Payout ratio | -0.010 | 0.006 | -1.667 |
| Cash slack | 0.018 | 0.007 | 2.571 |

**Supplementary Table S6. Matching balance diagnostics (standardized mean differences).**

Notes: Values closer to zero indicate better balance. A common rule of thumb is SMD < 0.10 after matching.

| **Covariate** | **SMD Before** | **SMD After** |
| --- | --- | --- |
| Size | 0.35 | 0.04 |
| ROA | 0.22 | 0.03 |
| Tangibility | 0.18 | 0.05 |
| Growth | 0.15 | 0.02 |
| Innovation | 0.20 | 0.04 |
| Industry dummies | 0.40 | 0.00 |

**Supplementary Table S7. Matched difference-in-differences (family vs matched non-family).**

Dependent variable: Debt maturity (col 1) and leverage (col 2)

| **Variables** | **(1) Debt maturity** | **(2) Leverage** |
| --- | --- | --- |
| Family × Post | 0.018** | 0.010** |
|  | (0.007) | (0.005) |
| Firm FE | Yes | Yes |
| Industry×Year FE | Yes | Yes |
| Obs. | 1800 | 1800 |
| R² | 0.630 | 0.590 |
| Controls | Yes | Yes |

Notes: The coefficient on Family×Post captures the differential post-period change in outcomes for family firms relative to matched non-family controls.

**Supplementary Table S8. Robustness summary across hypotheses and designs.**

Notes: Ranges summarize coefficient magnitudes across the main specifications reported in Tables 3–13. n.s. = not significant.

| **Hypothesis** | **Baseline FE (coef.)** | **System-GMM** | **Succession DiD/Event study** | **PSM / Matched DiD** | **Key interpretation** |
| --- | --- | --- | --- | --- | --- |
| H1: Control → Leverage | 0.010 to 0.020 | Positive, significant | Small / n.s. | Positive, modest | Control preservation via non-dilutive debt |
| H2: Identity/Attachment → Maturity | 0.016 to 0.030 | — | Positive, significant | Positive, significant | Rollover-risk management and continuity |
| H3: Attachment × Shocks → Maturity | 0.023 to 0.030 | — | Positive (COVID, Hike) | — | Resilience under refinancing stress |
| H4: SEW × Innovation → Maturity | 0.038 to 0.060 | — | Positive, stronger post-succession | Positive, significant | Long-horizon financing supports innovation |

# Appendix A. Variable definitions

Table A1. Variable definitions.

| **Category** | **Variable** | **Definition** |
| --- | --- | --- |
| Financing outcomes | Leverage | Total interest-bearing debt / total assets. |
| Financing outcomes | Debt maturity | Long-term financial debt / total financial debt (LT/TDebt), defined when total financial debt > 0 |
| SEW | SEW_Control (F) | Composite index of standardized FO, FG, and FM; scaled to [0,1] for reporting. |
| SEW | SEW_Identity (I) | Identity score based on eponymy and family-name signaling in corporate identity disclosures; scaled to [0,1]. |
| SEW | SEW_Attachment (E) | Attachment score from narrative disclosures: frequency of attachment-related language (T⁺) minus detachment language (T⁻), scaled by document length; winsorized and standardized; lagged in maturity models. |
| Control components | FO | Family voting-right share (0–1). |
| Control components | FG | Family involvement in governance (e.g., board/top management presence), scaled (0–1). |
| Control components | FM | Indicator = 1 if CEO/chair is a family member; 0 otherwise. |
| Innovation & shocks | INNOV_RnDint | R&D expenditure / assets (fallback: intangibles/assets when R&D missing). |
| Innovation & shocks | SHOCK_Covid | Dummy = 1 for 2020–2021. |
| Innovation & shocks | SHOCK_RateHike | Dummy = 1 for 2022–2023. |
| Controls | ROA | EBIT / assets. |
| Controls | SIZE | Natural logarithm of total assets. |
| Controls | TANG | Property, plant, and equipment / assets. |
| Controls | GROWTH | Annual change in ln(assets). |
| Portfolio outcomes | Bank concentration | Relationship-lending concentration. Primary measure: HHI of bank-debt shares ; fallback: top-1 lender share (higher = more concentrated). |
| Portfolio outcomes | Payout ratio | Dividends / net income; set to 0 when net income ≤ 0 and capped at 1.25. |
| Portfolio outcomes | Cash slack | Cash and equivalents / total assets. |

Table A2. Within- and between-firm variation in SEW proxies and key outcomes.

| Variable | Overall SD | Within SD | Between SD | Within share |
| --- | --- | --- | --- | --- |
| SEW_Control (0–1) | 0.193 | 0.090 | 0.171 | 0.47 |
| SEW_Identity (0–1) | 0.140 | 0.050 | 0.131 | 0.36 |
| SEW_Attachment (0–1) | 0.140 | 0.060 | 0.126 | 0.43 |
| Debt maturity (LT/TDebt) | 0.118 | 0.055 | 0.104 | 0.47 |

Notes: Within SD is computed from deviations from firm means; between SD is computed from firm means. Non-trivial within variation supports identification in firm fixed-effects specifications.

# Appendix B. Text-based SEW measurement and sample construction details

This appendix provides additional detail on (i) the construction of the text corpus used to operationalize identity and attachment and (ii) diagnostic checks supporting the validity of the resulting proxies. The goal is to make the measurement fully traceable and replicable.

## B.1 Sample construction and text coverage

Figure B1 summarizes the construction of the matched panel and highlights the role of text availability. The main estimation sample is balanced over 2010–2024 because the narrative sources used for SEW proxies can be collected consistently in that period.

## B.2 Corpus definition and extraction

We focus on narrative sections where the leadership team communicates strategic intent, values, and long-term orientation. These sections are conceptually closest to SEW because they convey family identity claims and continuity narratives that matter for external stakeholders. For each firm-year, we retain one primary leadership narrative (chair/CEO letter) and exclude purely statutory disclosures (e.g., accounting notes) from the SEW corpus.

## B.3 Pre-processing pipeline (French language)

All documents are converted to plain text, and we apply standardized cleaning steps: encoding normalization, lowercasing, removal of boilerplate tables, tokenization, French stopword removal, and lemmatization. We preserve negations and compute term frequencies per 1,000 words to normalize for document length. Scores are winsorized within year (p1–p99) and lagged by one year in regressions to reduce simultaneity.

## B.4 Lexicon summary and examples

Table B1 reports the full set of terms used to construct the attachment (T⁺) and detachment/rupture (T⁻) dictionaries. Terms were developed iteratively to retain face validity while avoiding purely industry-specific jargon.

| **Attachment / continuity terms (T⁺)** | **Detachment / rupture terms (T⁻)** |
| --- | --- |
| héritage | rupture |
| pérennité | court terme |
| transmission | désengagement |
| générations | cession |
| continuité | volatilité |
| long terme | opportunisme |
| valeurs | liquidation |
| ancrage | désinvestissement |
| engagement | spéculation |
| fidélité | abandon |

Table B1. Summary of the French-language lexicon used to measure emotional attachment.

Example matches illustrating the scoring logic include phrases such as “assurer la transmission aux générations futures”, “préserver l’héritage familial”, and “inscrire l’entreprise dans le long terme”. The attachment score is computed as the net frequency of T⁺ minus T⁻ terms, normalized by document length.

## B.5 Manual validation and placebo tests

We validate the automated measures using manual coding and placebo sections. Two independent coders rate the salience of identity and attachment on a stratified set of leadership narratives using a pre-defined rubric. Automated scores align closely with coder assessments and exhibit high intercoder agreement. In placebo tests, dictionary scores computed on SEW-neutral accounting notes do not predict financing outcomes.

| **Validation metric** | **Identity (I)** | **Attachment (E)** |
| --- | --- | --- |
| Correlation with manual coding (Pearson r) | 0.68 | 0.72 |
| Intercoder reliability (Cohen’s κ) | 0.76 | 0.78 |
| Placebo predictiveness (p-value, notes section) | 0.61 | 0.58 |

Table B2. Construct-validity diagnostics for text-based SEW measures.

## B.6 Staggered DiD estimates around succession

To address concerns with TWFE under staggered adoption, we compute group-time average treatment effects and cohort-specific event-study coefficients. Table B3 summarizes aggregated ATT estimates (post-succession) and confirms that conclusions are consistent with the main DiD tables.

| **Estimator / outcome** | **ATT (post-succession)** | **Std. error** |
| --- | --- | --- |
| Callaway–Sant’Anna (2021), Debt maturity | 0.012 | 0.004 |
| Callaway–Sant’Anna (2021), Leverage | 0.003 | 0.002 |

Table B3. Staggered DiD estimates around succession (aggregated effects).

# Appendix C. Additional robustness and mechanism tests

**Table C1. Text availability and selection diagnostics.**

Panel A. Comparison of firms with versus without narrative coverage (ORBIS/DIANE universe).

| Variable | With text | Without text | Difference |
| --- | --- | --- | --- |
| ln(Assets) | 14.51 | 13.92 | 0.59*** |
| ROA | 0.031 | 0.027 | 0.004* |
| Leverage | 0.54 | 0.52 | 0.02 |
| Debt maturity | 0.29 | 0.27 | 0.02** |
| Tangibility | 0.21 | 0.18 | 0.03*** |
| ln(Age) | 1.35 | 1.29 | 0.06*** |
| Listed (indicator) | 0.12 | 0.04 | 0.08*** |

Notes: Differences are based on pre-period (t−1) characteristics where applicable. Significance: *** p<0.01, ** p<0.05, * p<0.10.

Panel B. Baseline versus selection-adjusted estimates for key coefficients.

| Key coefficient | Baseline FE | IPW-FE | Heckman adj. |
| --- | --- | --- | --- |
| Control → Leverage | 0.010** (0.005) | 0.011** (0.005) | 0.012** (0.006) |
| Identity → Maturity | 0.012** (0.006) | 0.013** (0.006) | 0.012* (0.007) |
| Attachment(t−1) → Maturity | 0.015*** (0.005) | 0.016*** (0.005) | 0.014** (0.006) |

Notes: Baseline models include firm FE and year FE (leverage) or firm FE and industry×year FE (maturity), with clustered standard errors at the firm level. IPW uses inverse predicted text-coverage probabilities. Heckman uses reporting propensity/listing status as exclusion restrictions. See Section 3.2.4 for details.

**Table C2. Horse-race regressions: mapping SEW dimensions to leverage and maturity.**

All specifications include the full set of controls (ROA, size, tangibility, growth). Maturity models also control for leverage.

| Variables | (1) Leverage (Family) | (2) Leverage (Full) | (3) Maturity (Family) | (4) Maturity (Full) |
| --- | --- | --- | --- | --- |
| SEW control (F) | 0.017*** | 0.009** | 0.003 | 0.002 |
|  | (0.006) | (0.004) | (0.005) | (0.004) |
| SEW identity (I) | 0.002 | 0.001 | 0.012** | 0.010** |
|  | (0.004) | (0.003) | (0.006) | (0.005) |
| SEW attachment (E, t−1) | 0.001 | 0.000 | 0.015*** | 0.013*** |
|  | (0.003) | (0.003) | (0.005) | (0.004) |
| Control | Yes | Yes | Yes | Yes |
| Firm FE | Yes | Yes | Yes | Yes |
| Year FE | Yes | Yes | No | No |
| Industry×Year FE | No | No | Yes | Yes |
| Observations | 1,260 | 2,520 | 1,260 | 2,520 |

Notes: Standard errors clustered at the firm level. Significance: *** p<0.01, ** p<0.05, * p<0.10.

**Table C3. Addressing textual endogeneity: tone controls and lead–lag placebos (debt maturity).**

Dependent variable: debt maturity (Long-term financial debt / total financial debt). Family sample. Firm FE and industry×year FE.

| Variables | (1) Baseline | (2) + General tone | (3) Pre-period E | (4) Lead E(t+1) |
| --- | --- | --- | --- | --- |
| SEW attachment (E, t−1) | 0.015*** | 0.014*** | — | — |
|  | (0.005) | (0.005) |  |  |
| Pre-period attachment (avg. t−3 to t−1) | — | — | 0.013** | — |
|  |  |  | (0.006) |  |
| Lead attachment (E, t+1) | — | — | — | 0.001 |
|  |  |  |  | (0.004) |
| SEW identity (I) | 0.012** | 0.011** | 0.010** | 0.011** |
|  | (0.006) | (0.006) | (0.005) | (0.006) |
| General tone (pos–neg) | — | 0.003 | — | — |
|  |  | (0.004) |  |  |
| Controls + Leverage | Yes | Yes | Yes | Yes |
| Firm FE | Yes | Yes | Yes | Yes |
| Industry×Year FE | Yes | Yes | Yes | Yes |
| Observations | 1,260 | 1,260 | 1,260 | 1,260 |

Notes: “General tone” (pos–neg) is constructed from document-level positivity and negativity counts using a financial-language dictionary adapted for French disclosures. Lead tests use E(t+1) to probe reverse causality. Standard errors clustered at the firm level.

**Table C4. Robustness to alternative maturity measures and debt-selection.**

Family sample. Main coefficients reported; all models include controls and fixed effects as indicated.

| Variables | (1) LT financial debt / assets | (2) Fractional logit (maturity) | (3) Two-step selection adj. |
| --- | --- | --- | --- |
| SEW identity (I) | 0.009** | 0.010** | 0.009* |
|  | (0.004) | (0.005) | (0.005) |
| SEW attachment (E, t−1) | 0.011*** | 0.012*** | 0.010** |
|  | (0.004) | (0.004) | (0.005) |
| Leverage (control) | 0.120** | 0.105** | 0.118** |
|  | (0.050) | (0.052) | (0.053) |
| Firm FE | Yes | Yes | Yes |
| Industry×Year FE | Yes | Yes | Yes |
| Observations | 1,350 | 1,260 | 1,260 |

Notes: Column (1) uses long-term financial debt scaled by assets (LT/assets) to avoid conditioning on total financial debt > 0. Column (2) estimates a fractional logit model for maturity. Column (3) reports a two-step selection adjustment. Standard errors clustered at the firm level.

**Table C5. Innovation robustness: lagged R&D, high-innovation dummy, and patent-based measures.**

Dependent variable: debt maturity. Family sample. Firm FE and industry×year FE.

| Variables | (1) Innov lagged | (2) High innov dummy | (3) Patent intensity | (4) R&D observed subsample |
| --- | --- | --- | --- | --- |
| Attachment × Innovation | 0.060*** | 0.028** | 0.015** | 0.063*** |
|  | (0.020) | (0.013) | (0.007) | (0.021) |
| Identity × Innovation | 0.042** | 0.019* | 0.010* | 0.045** |
|  | (0.019) | (0.011) | (0.006) | (0.020) |
| Main effects included | Yes | Yes | Yes | Yes |
| Controls | Yes | Yes | Yes | Yes |
| Firm FE | Yes | Yes | Yes | Yes |
| Industry×Year FE | Yes | Yes | Yes | Yes |
| Observations | 1,260 | 1,260 | 1,260 | 980 |

Notes: Innovation intensity is measured as R&D/assets; when R&D is missing, patent-based measures (log(1+patents)) provide an alternative. High-innovation is a within-year median split. Innovation is lagged by one year to mitigate simultaneity. Standard errors clustered at the firm level.

**Table C6. Mechanism evidence: banking concentration, borrowing costs, and rollover risk.**

Family sample. All models include firm FE and year or industry×year FE as appropriate.

| Variables | (1) Bank concentration (HHI) | (2) Cost of debt | (3) Rollover risk (ST share) |
| --- | --- | --- | --- |
| SEW attachment (E, t−1) | 0.031*** | −0.004** | −0.018** |
|  | (0.010) | (0.002) | (0.008) |
| SEW identity (I) | 0.012* | −0.002 | −0.009 |
|  | (0.007) | (0.002) | (0.007) |
| Attachment × COVID | 0.014* | −0.003* | −0.012* |
|  | (0.008) | (0.002) | (0.007) |
| Attachment × RateHike | 0.016** | −0.003* | −0.013* |
|  | (0.007) | (0.002) | (0.007) |
| Controls | Yes | Yes | Yes |
| Firm FE | Yes | Yes | Yes |
| Time FE | Yes | Yes | Yes |
| Observations | 1,260 | 1,260 | 1,260 |

Notes: Bank concentration is measured as the Herfindahl–Hirschman Index of bank debt shares; cost of debt is interest expense divided by total debt; rollover risk is the share of short-term debt in total debt. Interaction terms allow the mechanism to intensify during stress periods. Standard errors clustered at the firm level.

Table C7. Robustness: Excluding 2020–2021 (PGE/COVID).

Dependent variable: debt maturity (Long-term financial debt / total financial debt). Family sample. Firm FE and industry×year FE.

| Variables | (1) Baseline (2010–2024) | (2) Excluding 2020–2021 |
| --- | --- | --- |
| Identity (I) | 0.028*** (0.009) | 0.024** (0.010) |
| Attachment (E) | 0.022** (0.009) | 0.019** (0.009) |
| Obs. | 1260 | 1080 |

Notes: Column (2) replicates the baseline maturity specification while excluding fiscal years 2020–2021 (PGE/COVID) from the estimation sample. Family sample. Firm fixed effects and industry×year fixed effects are included. Standard errors are clustered at the firm level.

Table C8. System-GMM sensitivity: restricting the instrument count.

Dependent variable: Leverage (interest-bearing debt / assets). Family sample.

| Variables / diagnostics | (1) Baseline System-GMM | (2) Restricted instruments |
| --- | --- | --- |
| L1 leverage | 0.650*** | 0.612*** |
| SEW control (F) | 0.020*** | 0.017** |
| Instruments | 78 | 42 |
| AR(2) p-value | 0.310 | 0.284 |
| Hansen p-value | 0.190 | 0.227 |
| Firms | 90 | 90 |
| Obs. | 1350 | 1350 |

Notes: Column (2) re-estimates the family-sample System-GMM while further limiting the instrument count by restricting lag depth (e.g., lags 2–3) and collapsing instruments. The key purpose is to verify that the SEW-control coefficient remains qualitatively similar under a stricter instrument set.
